# Supplementary material for: Six-helix bundle completion in the distal C-terminal heptad repeat region of gp41 is required for efficient human immunodeficiency virus type 1 infection
Source: PubMed Central journal article supplement (PMC5879932; doi:10.1186/s12977-018-0410-9), 2018-04-02

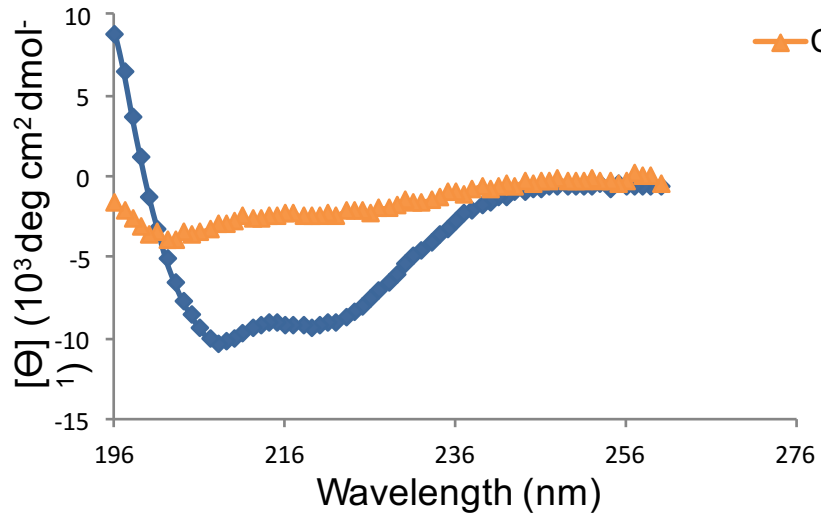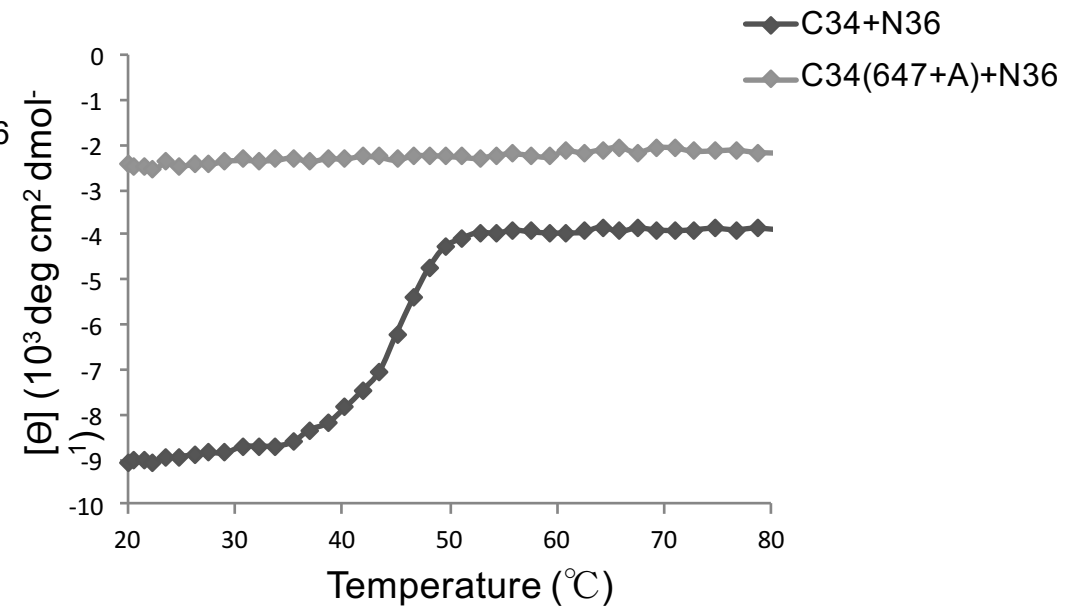

Supplement: 12977_2018_410_MOESM1_ESM.pdf [file 12977_2018_410_MOESM1_ESM.pdf]
